# Supplementary material for: Klenkia terrae resistant to DNA extraction in germ-free mice stools illustrates the extraction pitfall faced by metagenomics
Source: PubMed Central journal article supplement (PMC7311423; doi:10.1038/s41598-020-66627-0), 2020-06-23
Supplement: 41598_2020_66627_MOESM3_ESM.pdf [file 41598_2020_66627_MOESM3_ESM.pdf]

**Research article: *Klenkia terrae* resistant to DNA extraction in germ-free mice stools illustrates the extraction pitfall faced by metagenomics.**

Julien Andreani<sup>1</sup>, Matthieu Million<sup>1</sup>, Jean-Pierre Baudoin<sup>1</sup>, Yusuke Ominami <sup>2</sup>, Jacques Yaacoub Bou Khalil<sup>3</sup>, Cécile Frémond<sup>4</sup>, Saber Khelaifa<sup>1</sup>, Anthony Levasseur<sup>1</sup>, Didier Raoult<sup>1,3</sup>, Bernard La Scola<sup>1,3#</sup>

<sup>1</sup> Microbes, Evolution, Phylogeny and Infection (MEPI), Aix-Marseille Université UM63, Institut de Recherche pour le Développement IRD 198, Assistance Publique – Hôpitaux de Marseille (AP-HM), Marseille, France.

<sup>2</sup> Hitachi High-Technologies Corporation, Science & Medical Systems Business Group  
24-14, Nishi-shimbashi 1-chome, Minato-ku, Tokyo 105-8717 Japan.

<sup>3</sup> Institut Hospitalo-Universitaire (IHU) - Méditerranée Infection, Marseille, France

<sup>4</sup> Phenomin-TAAM, UPS44, Centre National de la Recherche Scientifique, Orléans, France

#Corresponding author: Bernard La Scola
